# Supplementary material
Source: PubMed Central journal article supplement (PMC4134950)
Supplement: NIHMS572034-supplement-1.pdf [file NIHMS572034-supplement-1.pdf]

## Supplemental Figure 1

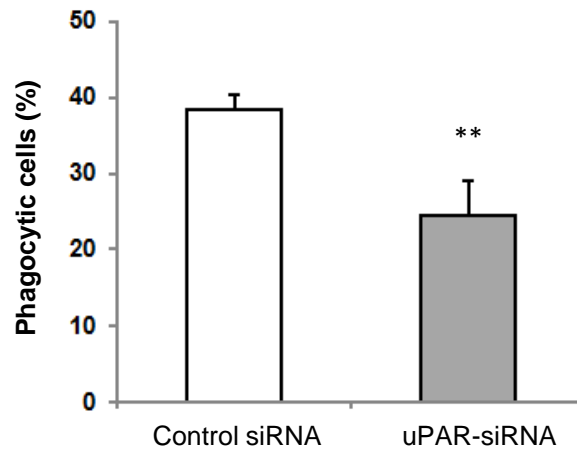

**Supplemental Figure 1. Small interfering RNA (siRNA)-mediated downregulation of uPAR in human monocyte cell line THP-1 cells inhibits internalization of apoptotic cells.** FITC-labeled siRNA oligonucleotides (stealth RNAi) were purchased from Invitrogen. The sequence of human uPAR cDNA (5'-GGTGAAGAAGGGCGTCCAA-3') was selected as the targeting region, and a nonsilencing siRNA, 5'-AACCTGCGGGAAGAAGTGG-3', was used as a control. The siRNA oligo was introduced into THP-1 cells purchased from the American Type Culture Collection (ATCC) by electroporation as previously described (Cell Death Differ. 2013;20:1230-1240 and J Biol Chem 2008; 283:5296-5305). Internalization of apoptotic cells by transfected THP-1 cells was performed as described in the legend for Figure 4. \*\*,  $p < 0.01$ .

## Supplemental Figure 2

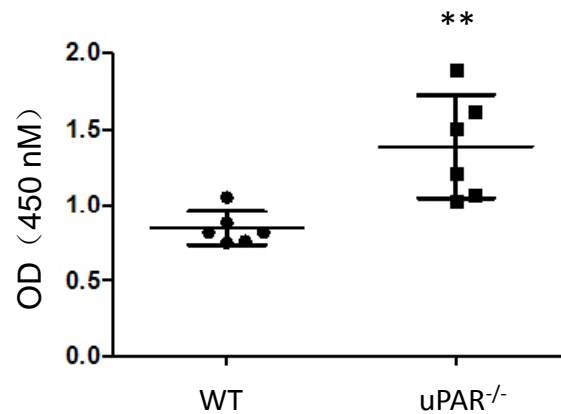

**Supplemental Figure 2. Measurement of serum immunoglobulins in WT and uPAR-deficient mice.** Measurement of autoantibody in plasma was performed as previously described (J Exp Med. 1998;188: 387–392, J Exp Med. 2004;200:459–467 and Blood 1995; 86:3083-3089). Briefly, after the 96-well ELISA plates were coated with 50  $\mu\text{g/ml}$  PS, they were dried under nitrogen and blocked with 10% fetal calf serum (FCS). At the end of experiments described in the legend for Figure 3A, plasma was collected from WT and uPAR-deficient mice. Mouse serum was diluted 50 times in PBS and added to the 96-well ELISA plates, followed by incubation at 37°C for 1 hour. The mouse antibodies bound to the plate were detected using HRP-conjugated goat anti-mouse immunoglobulins in PBS containing 3%FCS. The peroxidase activity was detected using TMB as a substrate, and the color reaction was read at 450 nM in a SpectraMax M5 Microplate Reader (Molecular Devices). \*\*,  $p < 0.01$

### Supplemental Figure 3

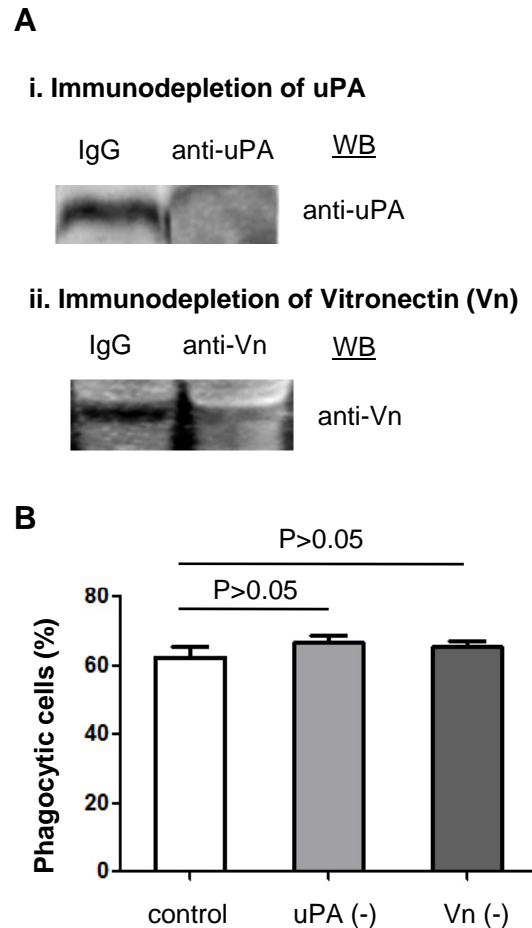

**Supplemental Figure 3. Immunodepletion of Vitronectin or uPA does not affect internalization of apoptotic cells.** **A.** As previously described (Investigative Ophthalmology & Visual Science 1992;33:2687-92, J Neurosurgery 2007;107:578-585), human normal serum were incubated overnight at 4C with anti-uPA antibody (R&D Systems, MAB1310), anti-vitronectin antibody (Cedarlane CL20170A) or nonimmune IgG, which was conjugated to Portein A/G Sepharose beads (Santa Cruz Biotechnology, Inc), respectively. This procedure was repeated seven more times for anti-vitronectin antibody. Immunodepletion of uPA (i) and Vitronectin (Vn, ii) was analyzed by immunoblotting. **B.** The uPAR-293 cells were incubated with apoptotic cells in serum that was immunodepleted using IgG (control), anti-uPA [uPA(-)] or anti-Vn [Vn(-)] antibodies, respectively. After treatment with TB, the internalization of apoptotic cells was evaluated by flow cytometry as described in the legend for Figure 4.

### Supplemental Figure 4

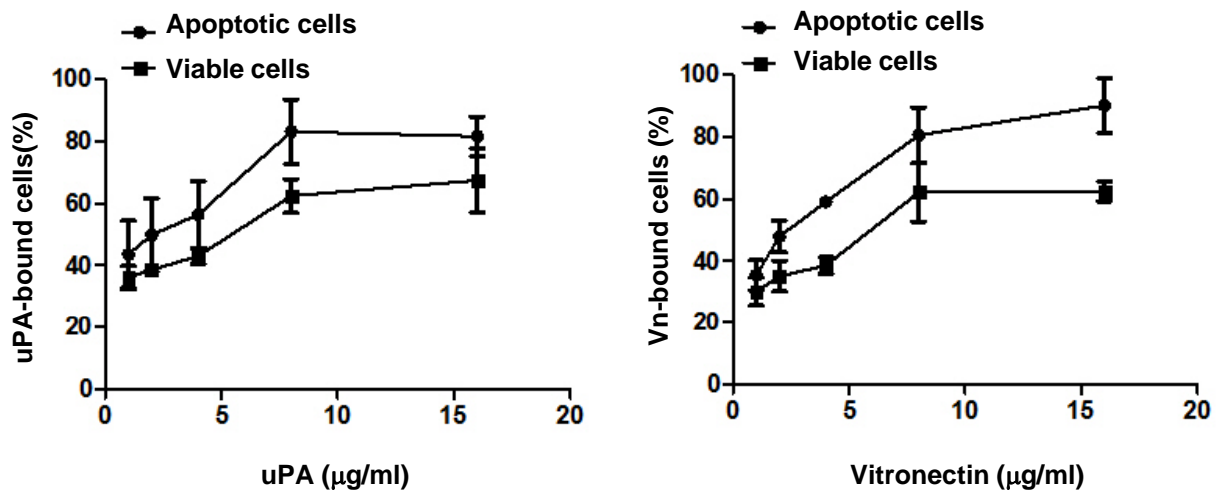

**Supplemental Figure 4. Vitronectin and uPA bind to both viable cells and apoptotic cells.** As described in the legend for Figure 5(D), mixed apoptotic cells and viable cells were incubated with biotinylated-Vitronectin or -uPA at the indicated concentrations. After washing, the cells were labeled with PE-avidin and non-saturated amounts of FITC-annexin V. The intensity of PE fluorescence on apoptotic cells (FITC-AxV-positive) and viable cells (FITC-AxV-negative) was analyzed by flow cytometry. Shown were the quantification of the percentage of PE-positive cells, representing uPA-bound cells (%) and Vitronectin-bound cells (%).
